# Supplementary material for: In situ serial crystallography facilitates 96-well plate structural analysis at low symmetry
Source: PubMed Central journal article supplement (PMC11364034; doi:10.1107/s2052252524005785), 2024-07-15
Supplement: m-11-00780-sup1.pdf [file m-11-00780-sup1.pdf]

# IUCrJ

**Volume 11 (2024)**

**Supporting information for article:**

***In situ* serial crystallography facilitates 96-well plate for structural analysis at low symmetry**

**Nicolas Foos, Jean-Baptiste Florial, Mathias Eymery, Jeremy Sinoir, Franck Felisaz, Marcus Oscarsson, Antonia Beteva, Matthew W. Bowler, Didier Nurizzo, Gergely Papp, Montserrat Soler-Lopez, Max Nanao, Shibom Basu and Andrew A. McCarthy**

### S1. *MXCuBE-Web* for iSX data collection

The motorised crystal plate manipulator (PM) has been integrated into *MXCuBE-Web* as a new hardware object, which is called when PM is the goniometer-head. The hardware-object for PM is compatible with MD2S and MD3-Up diffractometers.

The PM hardware-object is based on Sample Changer object (or Class), exploiting all the sample changer characteristic such as: a *cell* in the sample-changer Dewar is substituted with a *row* in the 96 well-plate, a well in the plate represents a puck in the sample-changer Dewar, and a drop in the well represents the sample. It also has the mounting sample functionality, which implies a plate translational motion (horizontal and vertical) to position a drop. A plate class is organised in rows and columns – each well (Cell object) contains a drop (Drop object) and each drop could contain several crystals (Xtal object).

The PM hardware object is implemented in both *QT* and the latest Web versions of the *MXCuBE*. In the case of *MXCuBE-2*, based on *PyQt4*, the graphical user interface (GUI) was created by combining self-contained widgets. In the *MXCuBE-Web* version, the GUI is implemented with Javascript/ React-17 with the React-Bootstrap and the react-contextify libraries, displaying a more elegant context menu. In both versions, the GUI representing the 96-well plate provides a mode of interaction with the hardware object that controls the physical instrument. The code for *MXCuBE-Web* is open-source and freely available at <https://github.com/mxcube/mxcubeweb>. As a cross-facilities collaborative project, *MXCuBE-Web* and its plate manipulator implementation is available to other synchrotron beamlines.

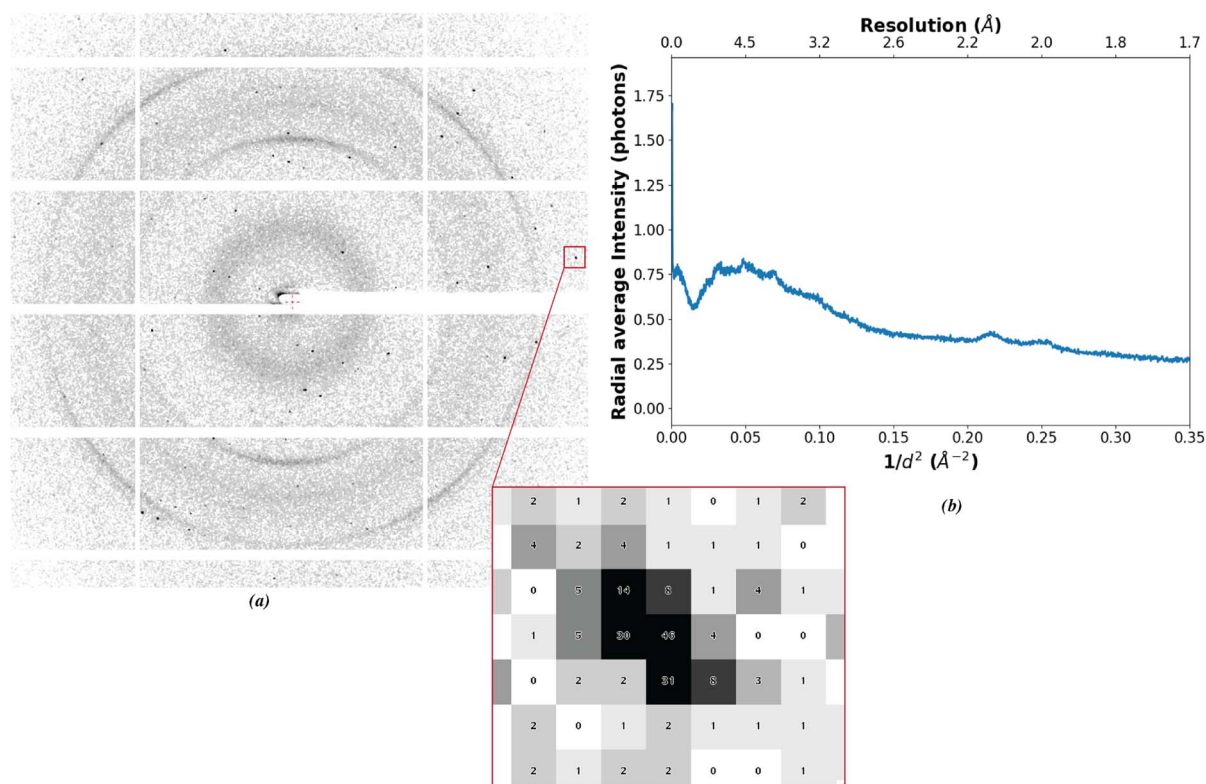

**Figure S1** Diffraction quality and background estimation. (a) An example diffraction pattern from iSX dataset. A high-resolution spot on the detector edge is highlighted in a red box and spot intensity together with surrounding background level has been shown in the zoomed inset at the bottom of the panel. (b) 1D plot shows the radially average background estimation as a function of resolution for the top (Polyolefin ultra-thin film, HJ Bioanalytik, GmbH) and bottom layers (ultra-thin COC-based film) of the CrystalDirect plate together with crystallisation drop at the equivalent X-ray flux.

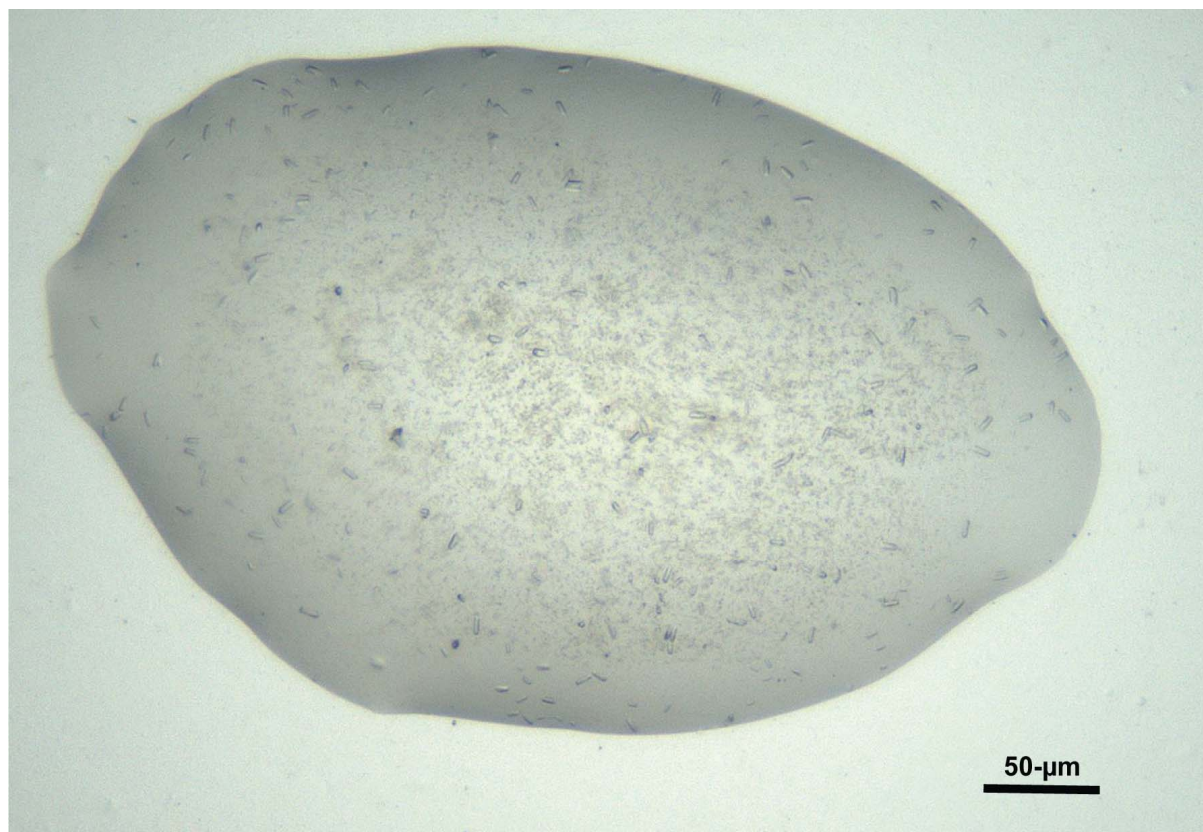

**Figure S2** Visible microscope image of an example crystallisation drop depicting the microcrystals of r-ATX. The microcrystals are typically  $5 \times 5 \times 10 \mu\text{m}^3$  in size.

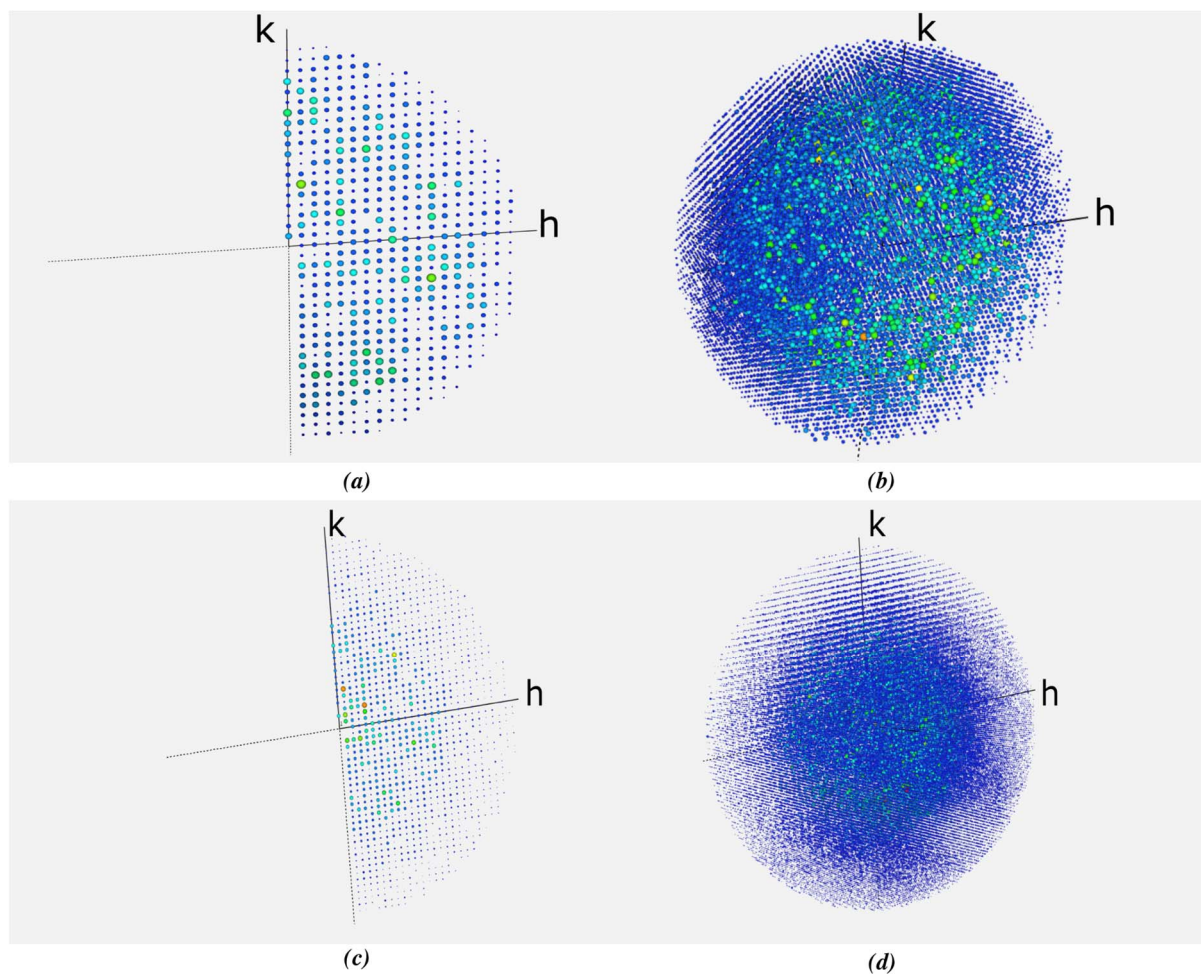

**Figure S3** HKL-view in 2D and 3D for iSX and cryo-SSX datasets. Rainbow coloured 2D representation of Bragg reflections from the iSX and cryo-SSX datasets are shown as projections along the  $l$  axis on the  $h$ - $k$  plan in panels (a) and (c), respectively. 3D rainbow coloured representation of Bragg reflections from the iSX and cryo-SSX datasets in panels (b) and (d), respectively, showing a complete dataset with a full sampling of the reciprocal space. The resolution cut for the representation is  $3\text{\AA}$ .

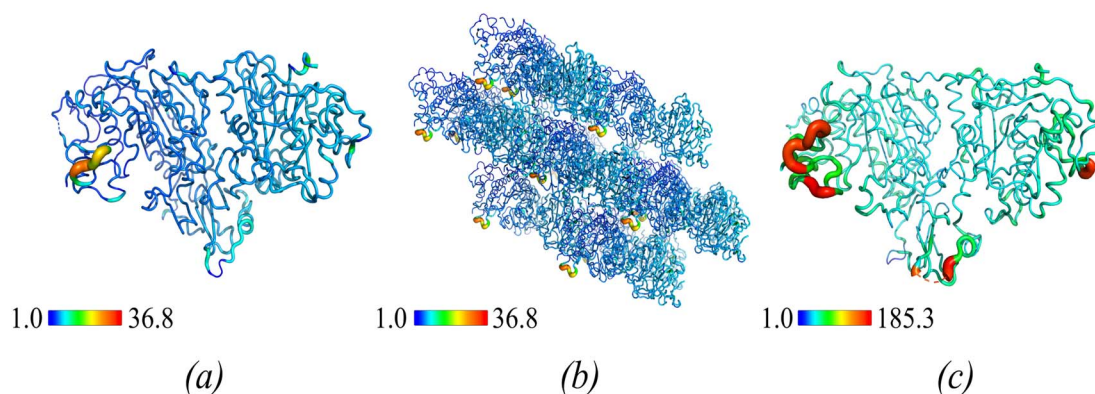

**Figure S4** RMSD ( $\text{\AA}$ ) between r-ATX-RT and r-ATX-Cryo structures (*a*) and (*b*), and comparison of B-factors ( $\text{\AA}^2$ ) between r-ATX-RT and r-ATX-Cryo structures (*c*). (*a*) Putty representation of ATX-RT model rainbow coloured. Colour and tube diameter representing the  $C\alpha$  RMSD ( $\text{\AA}$ ) value calculated between ATX-RT and ATX-Cryo. Loops with higher B-factor difference are shown in red and large tube diameter, and those with the lower B-factor difference are in dark blue with reduced tube diameter. (*b*) Crystal packing view. (*c*) Putty representation of the r-ATX-RT model rainbow coloured. Colour and tube diameter representing the  $C\alpha$  B-factors ( $\text{\AA}^2$ ) differences between r-ATX-RT and r-ATX-Cryo. Loops for which the B-factor difference are higher are represented in red and large tube diameter, and those with the lower difference are in blue with reduced tube diameter.
